RESEARCH ARTICLE

# Patterns of adherence to home blood pressure monitoring among men and women in the Electronic Framingham Heart Study

Tenes J. Paul<sup>1</sup>, Katherine Sadaniantz<sup>1</sup>, Apurv Soni<sup>1</sup>, Jean-Claude Asaker<sup>1</sup>, Chathurangi H. Pathiravasan<sup>2</sup>, Jordy Mehawej<sup>1</sup>, Andreas Filippaios<sup>1</sup>, Yuankai Zhang<sup>3</sup>, Ziyue Wang<sup>1</sup>, Chunyu Liu<sup>3</sup>, Honghuang Lin<sup>1</sup>, Joanne M. Murabito<sup>4,5</sup>, David D. McManus<sup>1</sup>, Lara C. Kovell<sup>1\*</sup>

**1** Department of Medicine, UMass Chan Medical School, Worcester, Massachusetts, United States of America, **2** Department of Biostatistics, Johns Hopkins Bloomberg School of Public Health, Baltimore, Maryland, United States of America, **3** Department of Biostatistics, Boston University School of Public Health, Boston, Massachusetts, United States of America, **4** Boston University and The NHLBI's Framingham Heart Study, Framingham, Massachusetts, United States of America, **5** Department of Medicine, Division of General Internal Medicine, Boston Medical Center, Boston University Chobanian and Avedisian School of Medicine, Boston, Massachusetts, United States of America

\* [lara.kovell@umassmemorial.org](mailto:lara.kovell@umassmemorial.org)

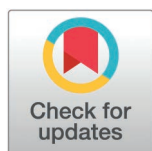

## OPEN ACCESS

**Citation:** Paul TJ, Sadaniantz K, Soni A, Asaker J-C, Pathiravasan CH, Mehawej J, et al. (2025) Patterns of adherence to home blood pressure monitoring among men and women in the Electronic Framingham Heart Study. PLoS One 20(12): e0337284. <https://doi.org/10.1371/journal.pone.0337284>

**Editor:** Buna Bhandari, Tribhuvan University Institute of Medicine, NEPAL

**Received:** August 18, 2025

**Accepted:** November 6, 2025

**Published:** December 17, 2025

**Peer Review History:** PLOS recognizes the benefits of transparency in the peer review process; therefore, we enable the publication of all of the content of peer review and author responses alongside final, published articles. The editorial history of this article is available here: <https://doi.org/10.1371/journal.pone.0337284>

**Copyright:** © 2025 Paul et al. This is an open access article distributed under the terms of the [Creative Commons Attribution License](https://creativecommons.org/licenses/by/4.0/), which permits unrestricted use, distribution,

## Abstract

Worldwide, there are differences in hypertension control by sex. The use of home blood pressure monitoring (HBPM) is associated with lower average blood pressures and higher medication adherence. However, little is known about adherence trajectories and sex differences in HBPM. This study characterizes adherence to HBPM among those with and without hypertension. Electronic Framingham Heart Study participants were instructed to perform HBPM weekly for 1 year. Adherence was defined as having  $\geq 1$  measurement per week averaged over 4-week segments. Primary exposures of hypertension status and sex were self-reported. Group-based trajectory modeling was used to identify adherence trajectories. Logistic regression was applied to investigate factors associated with membership in each trajectory group in the sex-stratified and whole cohorts. Among 990 participants (58% women, age  $53 \pm 9$  years, 26% hypertension), three groups with distinct HBPM adherence patterns were identified: “early discontinuation”, “gradual decrease”, and “high adherence”. Participants with hypertension were more likely to maintain “high adherence” compared to those without (OR 1.55; 95% CI 1.08–2.23), with similar findings seen among women with hypertension (OR 2.24; 95% CI 1.35–3.72) but not men. In women, these findings remained significant when adjusting for anxiety, depression, and blood pressure, but were attenuated by adjusting for age and income. This study highlights HBPM adherence trajectories and shows that women with hypertension were more likely to be in the high adherence group, though these associations were attenuated after

and reproduction in any medium, provided the original author and source are credited.

**Data availability statement:** Data cannot be shared publicly because access to these data is managed the Framingham Heart Study Repository. Data are available from the Framingham Heart Study for researchers who meet the criteria for access to confidential data. They can be contacted through a web-based application at <https://www.framinghamheartstudy.org/fhs-for-researchers/research-application/>.

**Funding:** “The Framingham Heart Study (FHS) was financially supported by the National Heart, Lung, and Blood Institute (NHLBI) of the National Institutes of Health and Boston University School of Medicine in the form of an NIH award (75N92019D00031). The electronic FHS research study was financially supported by a grant (R01HL141434) and an award (Robert Wood Johnson Award). This study was also financially supported by the National Heart, Lung, and Blood Institute (NHLBI) in the form of a grant (K23HL163450) received by LK. This study was also financially supported by the National Heart, Lung, and Blood Institute (NHLBI) in the form of grants (R01HL155343, R01HL141434, R33HL158541, U54HL143541 and U54HL143541-05S1, and UG3NS135168) received by DDM. This study was also financially supported by the National Heart, Lung, and Blood Institute (NHLBI) in the form of grants (U54HL143541 and U54HL143541-05S1, U01HL146382, and UG3NS135168) received by AS. This study was also financially supported by the American Heart Association in the form of a grant (AHA\_18SFRN34110082) received by AF”.

**Competing interests:** “The authors have read the journal’s policy and have the following competing interests: DDM has received research support from Fitbit, Apple Inc, Bristol–Myers Squibb, Boehringer–Ingelheim, Pfizer, Flexcon, Samsung, Philips Healthcare, and Biotronik, and he has received consultancy fees from Heart Rhythm Society, Bristol–Myers Squibb, Pfizer, Fitbit, Flexcon, Boston Biomedical Associates, VentureWell, Avania, NAMSA and Rose Consulting. DDM also declares financial support for serving on the Steering Committee for the GUARD-AD study (NCT04126486) and the advisory committee for the Fitbit Heart study (NCT04176926). AS has received consultancy fees from Pfizer and Advanced Research Program Agency for Health (ARPA-H). This does not alter our adherence to PLOS ONE policies on sharing data and materials. There are no patents, products in development or marketed products associated with this research to declare”.

adjusting for demographic factors and co-morbidities. Future studies should explore strategies to enhance adherence in populations at risk of early discontinuation.

## Introduction

Hypertension is one of the most common chronic diseases worldwide with an estimated prevalence of 1.3 billion [1]. In the United States alone, 122.4 million adults (47% of the population) meet the criteria for a diagnosis of hypertension [2], with 36% of the population recommended to be on antihypertensive medications [3,4]. Despite hypertension being a major risk factor for ischemic heart disease—the leading cause of death worldwide—it is estimated that 46% of individuals with hypertension remain unaware and untreated [5]. While tight blood pressure control has been shown to decrease the risk of cardiovascular events and all-cause mortality, rates of control in adults with hypertension have been inadequate [6,7]. National Health and Nutrition Examination Survey (NHANES) data found that despite hypertension control improving in the first ten years of the 21<sup>st</sup> century, the subsequent ten years have seen a more modest increase, with some groups, including women, experiencing declines [2]. Similar findings were seen in women with hypertension in the Canadian Health Measures Survey, with declining treatment and control rates in recent years [8]. With advancing age, the prevalence of hypertension among women surpasses that of men, with large cohorts reporting lower control rates and widening disparities with age in women vs. men despite higher rates of hypertension awareness and seeking treatment [8,9]. Moreover, women have higher rates of white coat hypertension, further complicating diagnosis and management [9–11].

Novel technologies, such as mobile health interventions, are associated with significant reductions in blood pressure, thereby offering a potential solution to addressing this sex-related disparity in hypertension management [12]. Home blood pressure monitoring (HBPM) in particular is indicated to confirm the initial diagnosis of hypertension, response to treatment, and for evaluation of white coat hypertension [4,13,14]. The use of HBPM, even at a frequency of weekly or monthly, has been associated with lower average blood pressure and higher adherence to antihypertensive medications [15,16], with effects that span across different cultures and demographic groups [17]. Despite this, adherence to HBPM is challenging due to a variety of factors, including patient motivation, health literacy issues, or inadequate training and guidance from healthcare providers [18–20]. Given the known sex differences in blood pressure trajectories, control, and white coat hypertension, there are many factors that can contribute to sex differences in HBPM [21–24]. A study of NHANES data from 2011–2014 showed no difference in HBPM use by sex, though HBPM frequency increased with advancing age, healthcare utilization, and having health insurance.[10] However, other studies have shown sex-differences in HBPM, though through self-reporting rather than device-based reporting of adherence [24–27]. The ambiguity surrounding sex-based differences in adherence to HBPM presents the opportunity to gain insight into the use of this tool [16,25,26,28–30].

In this study, we analyzed participants from the electronic Framingham Heart Study (eFHS) who were asked to regularly monitor their blood pressure at home. We aimed to characterize adherence to HBPM by sex in those with and without hypertension, while determining other factors associated with greater HBPM adherence. Based on the prior literature, we hypothesize that women and older adults are more likely to adhere to HBPM.

## Materials and methods

### Data source: Electronic Framingham Heart Study cohort

The present study is a prospective cohort study analyzing data collected from participants enrolled in eFHS. The development of the eFHS cohort has been previously reported [31,32]. In brief, eFHS is an electronic sub-cohort of the Framingham Heart Study composed of members of the Third Generation Cohort, the New Offspring Cohort, and the multiethnic Omni Group 2 Cohort. These cohorts are the third generation of the original Framingham Heart Study cohort, the offspring of the original Framingham Heart Study cohort and their spouses, and members of the Framingham community from underrepresented ethnic groups, respectively [31,32]. The eFHS protocol was approved by the Institutional Review Board of Boston University Medical Center. This study has been approved by the appropriate ethics committee and has therefore been performed in accordance with the ethical standards laid down in the 1964 Declaration of Helsinki and its later amendments. All participants gave their informed consent prior to their inclusion in the study.

The eFHS cohort enrolled participants from the aforementioned cohorts starting between 2016 and 2019 by inviting them during regularly scheduled Framingham Heart Study research center examinations. To be eligible, participants had to own a smartphone (an iPhone with iOS version 9 or higher), be able to communicate in English, reside in the United States, and be willing to provide permissions for data sharing and notifications with research study staff. Android users were excluded from this study as the digital blood pressure device did not pair with the Android phone. Participants were given an Apple Watch series 0 as well as a Nokia-Withings Digital blood pressure device model BP-801 [31]. This blood pressure device was chosen given its Food and Drug Administration approval for HBPM, accuracy  $\pm 3$  mmHg, deployment in other digital health studies, and validation via the international scientific organization, Stride BP, which provides lists of validated blood pressure measuring devices [33,34]. All participants were instructed on the use of both electronic devices, including an initial in-person demonstration of the appropriate use of the blood pressure device, when possible. They were given written instructions on the use of their blood pressure device and on techniques for proper HBPM [31].

### Study protocol

Using the provided digital blood pressure devices, participants were instructed to check their blood pressure once weekly on the same day and around the same time over the course of the one-year follow-up period. All participants with at least one recorded blood pressure reading were included in this study. Blood pressure readings were synchronized with the eFHS app through an associated smartphone app (Nokia Health Mate). Blood pressure data were securely transmitted to the research center via the eFHS app. Any additional blood pressure readings collected at the participants' discretion were also collected and sent to the research center [31]. The initial blood pressure reading collected in the research center on the day of enrollment to teach participants how to properly use the system was excluded.

### Group-based trajectory modeling

Group-based trajectory modeling was used to identify trajectory patterns of adherence among the sample and was run using SAS with 2–5 groups. Bayesian Information Criterion (BIC) scores were calculated for different numbers of groups. The SAS procedure “Proc TRAJ” was used for group-based trajectory modeling. We assessed model fit by comparing the BIC of the 2-group and 3-group models. The 2-group model had a group that maintained strong adherence throughout the study period and a second group that had poor adherence up front and never improved. The 3-group model had an

intermediate group who gradually decreased their adherence over the year. Despite not having the best BIC score, the final model with three distinct trajectories was selected as it accounted for a third, intermediate group – a closer reflection of the typical trajectories real-life patients may have. This model is more inclusive of the types of adherence frequently encountered in clinical practice. In a sensitivity analysis, a 2-group model (high vs. low adherence) produced an odds ratio in the same direction as in the 3-group model, but did not reach statistical significance ([S1 Table](#)). This further supports the use of a 3-group classification, which provides more granular analysis to detect meaningful patterns.

## Definitions of exposure and outcome

To assess the role of sex-based differences between each of trajectory groups, a primary exposure of sex (per the eFHS survey, either male or female) was designated. A diagnosis of hypertension, based on participants' response ("yes"/"no") from a survey question in the eFHS examination data: "have you been told by your doctor you have high blood pressure or hypertension," was selected as an effect modifier. These data were collected at the time of enrollment during an in-person examination. HBPM adherence was measured over the 52-week follow-up period, broken up into 4-week segments. The primary outcome was adherence to weekly HBPM. For each week, participants were coded as "0" or "1" – with "0" indicating that they did not log a HBPM reading and "1" if they had logged at least one reading. HBPM adherence was defined as  $\geq 1$  blood pressure measurement per week, averaged over 4-week segments. For example, if participants logged one or more blood pressure readings for three weeks but did not log a reading in the fourth week, their weekly HBPM adherence was calculated as 75%.

## Covariates

The covariates in the analysis were selected based on a qualitative assessment of what factors might be most clinically relevant and were collected in-person at the examination center unless specified. Among those, covariates found to be statistically significant in the univariate analysis ( $p < 0.05$ ) and those that had a potentially clinically relevant association with HBPM use were selected in the models. Age as a continuous variable was included, given that hypertension prevalence increases with advancing age and older individuals tend to demonstrate higher rates of adherence [30]. Similarly, household income, defined as a categorical variable ( $< \$35,000/\text{year}$ ,  $\$35,000\text{--}100,000/\text{year}$ , and  $> \$100,000/\text{year}$ ) was included given that individuals with higher socioeconomic status may have higher rates of self-advocacy and may be more medically literate [35]. Baseline systolic blood pressure from the initial home blood pressure measurement was included given that having a higher blood pressure can impact motivation for adherence to HBPM. Finally, baseline anxiety and depression were included, as these conditions—particularly when coinciding with one's medical conditions—may influence frequency of HBPM [36]. Mental health conditions were self-reported: participants were asked "Have you ever been told that you have any of the following mental health conditions?" and were given the choices: "depression," "anxiety," "other mental health diseases," or "none of the above." Models were progressively adjusted as follows: Model 1 adjusted for age, Model 2 adjusted for age and income, and Model 3 adjusted for age, baseline systolic blood pressure, and anxiety. Models 1 and 2 were aimed at evaluating demographic covariates while Model 3 evaluated clinical factors that may influence adherence.

## Statistical analysis

Statistical significance was considered a two-sided P value  $< 0.05$  for all statistical analyses. All analyses were performed using SAS version 9.4. Descriptive statistics were calculated for continuous variables using means and standard deviations and for categorical variables using frequency counts and percentages. The difference between adherence groups was assessed using the Chi-square test and ANOVA test for categorical variables and continuous variables, respectively. Given our focus on adherence trajectory differences by sex, we first used logistic regression models in the overall study

cohort to evaluate the outcome HBPM adherence. In these models, we included an interaction term between hypertension status (yes vs. no) and sex to examine whether adherence patterns differed by both hypertension status and sex. We then stratified by sex, based on an *a priori* decision, and used multivariable logistic models to investigate the association of the adherence patterns with hypertension status. These stratified models were adjusted for age, income, anxiety, and systolic blood pressure using the three models described above. Any observations that were missing a value for any variable were discarded from the analysis.

## Results

### Study cohort

Among the 1918 eFHS enrollees, 1125 participants chose to use a digital blood pressure device. Those who did not record at least 1 blood pressure reading were excluded, leaving 990 participants. Of the total study cohort (N = 990), 58.1% were women and the mean age ( $\pm$ SD) was  $53 \pm 9$  years. The median follow-up was 375 days from the enrollment date. At baseline, 25% of participants reported a diagnosis of hypertension and 21.3% (N = 211) were being treated with antihypertensive medications as shown in [Table 1](#). Most participants (93%) self-identified as non-Hispanic White. The majority (76%) were married and had completed at least some college (91%), with 61% reporting annual household income > \$100,000. Among the study cohort, there were relatively low prevalences of diabetes and cardiovascular disease at 8% and 4%, respectively ([Table 1](#)).

### Trajectories of adherence over the study period

In developing the adherence trajectory groups, a two-group model had the lowest BIC score (BIC = -9485.4 vs -8633.5 for the three-group model we ultimately used), however, the two-group model showed one group that maintained very high adherence throughout the study period and one that immediately discontinued HBPM.

The three trajectory groups correspond to distinct patterns of HBPM adherence ([Fig 1](#)) and were named based on their adherence characteristics. The largest group, “early discontinuation” (N = 429, 43.3% of total, 23.4% hypertension), demonstrated an early decline in adherence from the beginning of the study period. Adherence to weekly monitoring began at 48.0% and had a steep initial drop-off, decreasing to 1.7% by 28 weeks (study halfway point). The second trajectory group, “gradual decrease” (N = 339, 34.3% of total, 24.5% hypertension), began with 46.2% adherence to weekly monitoring and completed the 52 weeks at 28.5% adherence. The final trajectory group, “high adherence,” (N = 222, 22.4% of total, 32.1% hypertension) began with 79.9% adherence to weekly monitoring, which decreased to 75.9% at the end of 52 weeks.

### Trajectory group characteristics

When examining the three trajectory groups in univariate analysis, participants in the high adherence group were on average older than those in the early discontinuation and gradual decrease groups, (mean ages 56.6, 51.4, and 53.2 years, respectively;  $p < 0.001$ ) shown in [Table 2](#). There were no significant differences between the groups related to education level or full-time employment. In an unadjusted analysis of the entire study cohort, hypertension was associated with higher odds of high adherence versus early discontinuation (unadjusted OR 1.55; 95% CI 1.08–2.23) ([S2 Table](#)). However, this association was attenuated and no longer significant after adjustments for age, income, anxiety/depression, and baseline systolic blood pressure.

### Sex-based differences across the trajectory groups

In the overall population logistic regression models evaluating factors associated with HBPM adherence, we examined the interaction term between hypertension status and sex and found it to be non-significant ( $p = 0.11$ ). In the sex-stratified

**Table 1. Baseline characteristics of women and men, stratified by diagnosis of hypertension.**

|                                                          | Total Sample (n=990)* | Women (n = 576)         |                            | Men (n = 414)           |                            |
|----------------------------------------------------------|-----------------------|-------------------------|----------------------------|-------------------------|----------------------------|
|                                                          |                       | Hyperten-sion (n = 126) | No hyperten-sion (n = 448) | Hyperten-sion (n = 128) | No hyperten-sion (n = 286) |
| <b>Sociodemographic and biometric variables</b>          |                       |                         |                            |                         |                            |
| Age, years                                               | 53.2 ± 8.6            | 56.4 ± 7.7              | 51.7 ± 8.4                 | 57.6 ± 8.1              | 52.1 ± 8.4                 |
| <b>Race and Ethnicity</b>                                |                       |                         |                            |                         |                            |
| Non-Hispanic Black                                       | 21 (2.1)              | 3 (2.4)                 | 9 (2.0)                    | 5 (3.9)                 | 4 (1.4)                    |
| Non-Hispanic White                                       | 913 (93.0)            | 117 (92.9)              | 420 (94.8)                 | 115 (90.6)              | 259 (91.2)                 |
| Hispanic                                                 | 25 (2.6)              | 5 (4.0)                 | 6 (1.4)                    | 6 (4.7)                 | 8 (2.8)                    |
| Married/living as married                                | 747 (76.2)            | 85 (68.6)               | 331 (74.2)                 | 106 (83.5)              | 223 (79.1)                 |
| ≥ Some college education                                 | 901 (91.4)            | 105 (83.3)              | 417 (93.5)                 | 107 (84.3)              | 270 (94.7)                 |
| Full-time employment                                     | 700 (71.1)            | 76 (60.3)               | 290 (64.9)                 | 86 (68.3)               | 246 (86.6)                 |
| <b>Annual household income</b>                           |                       |                         |                            |                         |                            |
| Low (<\$35,000)                                          | 50 (5.4)              | 10 (8.7)                | 24 (5.7)                   | 4 (3.4)                 | 11 (4.0)                   |
| Mid-range (\$35,000-\$100,000)                           | 308 (33.2)            | 44 (38.3)               | 152 (36.4)                 | 47 (39.8)               | 65 (23.7)                  |
| High (>\$100,000)                                        | 569 (61.4)            | 61 (53.0)               | 242 (57.9)                 | 67 (56.8)               | 198 (72.3)                 |
| <b>Clinical and biometric factors</b>                    |                       |                         |                            |                         |                            |
| Current smoking                                          | 67 (6.8)              | 9 (7.1)                 | 32 (7.1)                   | 6 (4.7)                 | 20 (7.0)                   |
| Anti-hypertensive medication use                         | 211 (21.3)            | 101 (80.2)              | 3 (0.7)                    | 106 (82.8)              | 1 (0.4)                    |
| Diabetes diagnosis                                       | 77 (7.8)              | 21 (16.7)               | 14 (3.1)                   | 27 (21.1)               | 15 (5.2)                   |
| Cardiovascular disease                                   | 40 (4.0)              | 8 (6.4)                 | 4 (0.9)                    | 14 (10.9)               | 13 (4.6)                   |
| Atrial fibrillation                                      | 18 (1.8)              | 2 (1.6)                 | 4 (0.9)                    | 4 (3.1)                 | 8 (2.8)                    |
| Renal disease                                            | 22 (2.2)              | 4 (3.2)                 | 7 (1.6)                    | 7 (5.5)                 | 4 (1.4)                    |
| Body mass index (kg/m <sup>2</sup> )                     | 27.6 ± 4.9            | 29.1 ± 5.3              | 26.0 ± 4.7                 | 31.0 ± 4.7              | 28.1 ± 3.9                 |
| <b>Self-reported activity, health, and mental health</b> |                       |                         |                            |                         |                            |
| Sedentary hours                                          | 8.2 ± 3.1             | 7.7 ± 3.5               | 8.0 ± 3.1                  | 8.6 ± 3.2               | 8.6 ± 3.1                  |
| Moderate/heavy physical activity, hours                  | 2.9 ± 2.2             | 2.9 ± 2.3               | 2.7 ± 2.0                  | 3.4 ± 2.5               | 3.1 ± 2.4                  |
| Self-reported excellent health                           | 262 (26.5)            | 18 (14.3)               | 144 (32.1)                 | 18 (14.1)               | 82 (28.7)                  |
| Depression                                               | 155 (16.5)            | 34 (27.4)               | 75 (17.5)                  | 15 (12.6)               | 31 (11.4)                  |
| Anxiety                                                  | 134 (14.2)            | 25 (20.2)               | 80 (18.7)                  | 9 (7.6)                 | 20 (7.4)                   |
| <b>Blood pressure characteristics</b>                    |                       |                         |                            |                         |                            |
| Baseline Systolic BP                                     | 120 ± 15              | 126 ± 15                | 114 ± 13                   | 131 ± 14                | 121 ± 12                   |
| Baseline Diastolic BP                                    | 76 ± 9                | 77 ± 9                  | 73 ± 8                     | 81 ± 9                  | 79 ± 8                     |
| Mean daytime home SBP <sup>†</sup>                       | 123 ± 13              | 126 ± 12                | 116 ± 11                   | 133 ± 11                | 126 ± 11                   |
| Systolic BP variability <sup>‡</sup>                     | 0.10                  | 0.09                    | 0.10                       | 0.09                    | 0.09                       |
| Diastolic BP variability <sup>‡</sup>                    | 0.11                  | 0.10                    | 0.10                       | 0.13                    | 0.10                       |
| Number of weeks with ≥ 1 home BP measurements            | 17.7 (15.3)           | 20.3 (15.9)             | 16.3 (14.3)                | 18.4 (16.1)             | 18.2 (15.9)                |

Abbreviations: BP – blood pressure.

\* Data presented as mean ± SD or N (%).

† Daytime defined as 5am–5 pm, nighttime defined as 5 pm–5am.

‡ Coefficient of variability (standard deviation/mean).

<https://doi.org/10.1371/journal.pone.0337284.t001>

unadjusted model, when compared to women without hypertension, women with hypertension were 2.24 times more likely to be in the high adherence group vs. early discontinuation (unadjusted OR 2.24; 95% CI 1.35–3.72) as seen in [Table 3](#). This association was attenuated by adjustments for age and income in Models 1 and 2 while the association persisted in

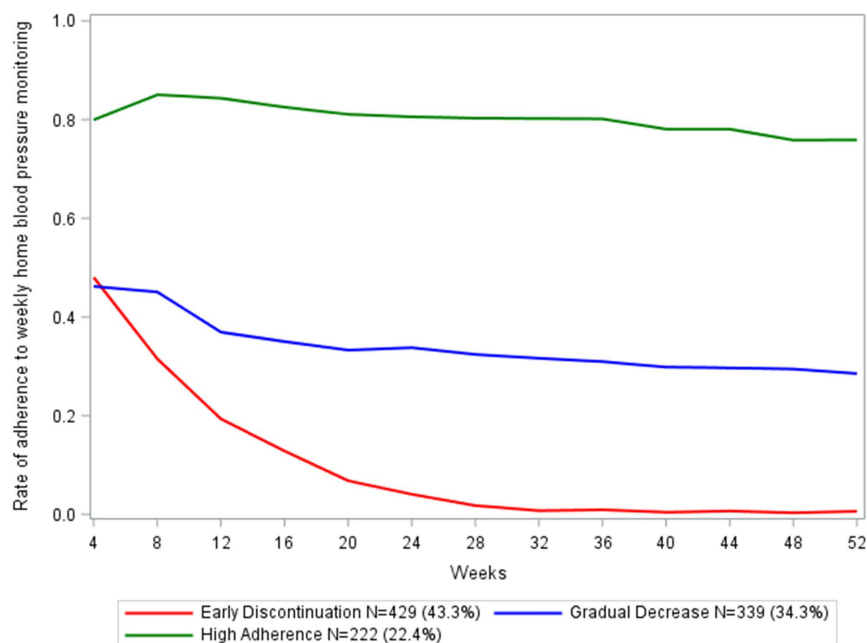

**Fig 1. Three distinct trajectory groups illustrating adherence to HBPM over 1 year.**

<https://doi.org/10.1371/journal.pone.0337284.g001>

models adjusting for age, anxiety/depression, and baseline blood pressure. No associations were observed in the gradual discontinuation vs. early discontinuation for all the models.

When compared to men without hypertension, men with hypertension did not have higher odds of being in the high adherence group vs. early discontinuation in either the unadjusted or adjusted analysis (unadjusted OR 1.05; 95% CI 0.62–1.76). Further comparison between men and women with and without hypertension is provided in [S3 Table](#).

## Discussion

In this middle-aged and older adult cohort of Framingham Heart Study participants who monitored home blood pressure as part of a study protocol, three distinct trajectory groups of early discontinuation, gradual decline, and high adherence were observed. The odds of achieving a high adherence trajectory, as opposed to early discontinuation, was significantly higher among the entire cohort and women with hypertension compared to those without hypertension. Among women, these associations were attenuated when adjusting for age and income, and remained significant when adjusting for anxiety/depression and baseline systolic blood pressure. Notably, the same association was not seen among men with hypertension. Although the interaction term between hypertension status and sex was non-significant, the differences in adherence patterns by sex and hypertension status in the stratified analyses are worth further exploration in larger studies and studies investigating alternative HBPM schedules.

These findings may expose gaps in the utilization of HBPM among men, leading to suboptimal adherence over time. Prior studies have examined sex-related factors associated with home blood pressure monitoring. The ESTEBAN study, a cross-sectional study of French adults, found that being a woman was associated with having a blood pressure monitoring device at home [37]. A study from Poland found that women, compared to men, were significantly more likely to be given a blood pressure monitor, perform HBPM regularly, and keep a blood pressure diary [25]. Our findings build on these prior studies and raise the question of why men may be less likely to maintain high adherence to HBPM. These data present

**Table 2. Univariate characteristics of the three home blood pressure monitoring adherence trajectory groups identified by group-based trajectory modeling.**

|                                               | Early discontinuation<br>(n=429)* | Gradual decrease<br>(n=339)* | High adherence<br>(n=222)* | p-value          |
|-----------------------------------------------|-----------------------------------|------------------------------|----------------------------|------------------|
| Women, total                                  | 246 (57.3)                        | 209 (61.7)                   | 121 (54.5)                 | 0.22             |
| All participants with Hypertension            | 100 (23.4)                        | 83 (24.5)                    | 71 (32.1)                  | <b>0.04</b>      |
| Women with hypertension                       | 42 (9.8)                          | 46 (13.6)                    | 38 (17.2)                  | <b>0.04</b>      |
| Men with hypertension                         | 58 (13.6)                         | 37 (10.9)                    | 33 (14.9)                  |                  |
| Women without hypertension                    | 203 (47.4)                        | 163 (48.1)                   | 82 (37.1)                  |                  |
| Men without hypertension                      | 125 (29.2)                        | 93 (27.4)                    | 68 (30.8)                  |                  |
| Age, years                                    | 51.4 ± 8.0                        | 53.2 ± 8.5                   | 56.6 ± 8.8                 | <b>&lt;0.001</b> |
| Married                                       | 323 (76.4)                        | 258 (76.6)                   | 166 (75.1)                 | 0.92             |
| ≥ Some college                                | 393 (92.5)                        | 311 (91.7)                   | 197 (88.7)                 | 0.26             |
| Full-time employment                          | 312 (72.7)                        | 238 (70.6)                   | 150 (68.5)                 | 0.52             |
| <b>Annual Household Income</b>                |                                   |                              |                            |                  |
| < \$35,000                                    | 19 (4.8)                          | 21 (6.6)                     | 10 (4.7)                   | 0.08             |
| \$35,000-100,000                              | 115 (29.0)                        | 110 (34.6)                   | 83 (39.0)                  |                  |
| > \$100,000                                   | 262 (66.2)                        | 187 (58.8)                   | 120 (56.3)                 |                  |
| <b>Clinical and biometric factors</b>         |                                   |                              |                            |                  |
| Anti-hypertensive medication use              | 79 (18.4)                         | 75 (22.1)                    | 57 (25.7)                  | 0.09             |
| Cardiovascular medication use                 | 14 (3.3)                          | 18 (5.3)                     | 6 (2.7)                    | 0.21             |
| Diabetes diagnosis                            | 31 (7.2)                          | 26 (7.7)                     | 20 (9.0)                   | 0.72             |
| Cardiovascular disease                        | 18 (4.2)                          | 10 (3.0)                     | 12 (5.4)                   | 0.34             |
| <b>Self-reported health and mental health</b> |                                   |                              |                            |                  |
| Depression                                    | 74 (19.1)                         | 58 (17.4)                    | 23 (10.4)                  | <b>0.02</b>      |
| Anxiety                                       | 69 (17.8)                         | 44 (13.2)                    | 21 (9.5)                   | <b>0.01</b>      |
| Self-reported excellent health                | 107 (24.9)                        | 94 (27.7)                    | 61 (27.5)                  | 0.64             |
| <b>Blood pressure characteristics</b>         |                                   |                              |                            |                  |
| Baseline SBP                                  | 119 ± 15                          | 120 ± 15                     | 121 ± 14                   | 0.30             |
| Baseline DBP                                  | 76 ± 9                            | 76 ± 9                       | 76 ± 8                     | 0.89             |
| Daytime home SBP <sup>†</sup>                 | 123 ± 14                          | 123 ± 13                     | 121 ± 11                   | 0.14             |
| Nighttime home SBP <sup>†</sup>               | 122 ± 14                          | 123 ± 13                     | 121 ± 13                   | 0.36             |
| SBP variability <sup>‡</sup>                  | 0.11                              | 0.10                         | 0.09                       |                  |
| DBP variability <sup>‡</sup>                  | 0.12                              | 0.10                         | 0.10                       |                  |
| Number of weeks with ≥ 1 home BP measurements | 5.1 (3.8)                         | 17.8 (7.3)                   | 41.8 (6.1)                 | <b>&lt;0.001</b> |

Abbreviations: DBP – diastolic blood pressure; SBP – systolic blood pressure.

\* Data presented as N (%) or mean±SD.

<sup>†</sup> Daytime defined as 5am-5 pm, nighttime defined as 5 pm-5am.

<sup>‡</sup> Coefficient of variability (standard deviation/mean).

<https://doi.org/10.1371/journal.pone.0337284.t002>

an opportunity to further investigate how to promote HBPM adherence use among men with hypertension and in younger populations.

Our findings demonstrate a signal towards high adherence to HBPM among women with hypertension. This is a valuable insight given the sex disparities surrounding hypertension treatment, related comorbidities and cardiovascular outcomes. There is an increased risk of cardiovascular disease, myocardial infarction, and heart failure seen in women at lower systolic blood pressure ranges compared to men [38]. Women exhibit faster rates of blood pressure progression

**Table 3. Stratified multivariable logistic regression models evaluating hypertension and home blood pressure monitoring adherence.**

|                             | Women with Hypertension**   |                               | Men with Hypertension**     |                               |
|-----------------------------|-----------------------------|-------------------------------|-----------------------------|-------------------------------|
|                             | High adherence <sup>#</sup> | Gradual decrease <sup>#</sup> | High adherence <sup>#</sup> | Gradual decrease <sup>#</sup> |
|                             | aOR<br>(95% CI)             | aOR<br>(95% CI)               | aOR<br>(95% CI)             | aOR<br>(95% CI)               |
| <b>Unadjusted Model</b>     | <b>2.24 (1.35, 3.72)</b>    | 1.36 (0.86, 2.17)             | 1.05 (0.62, 1.76)           | 0.86 (0.52, 1.40)             |
| <b>Model 1*</b>             | 1.65 (0.97, 2.82)           | 1.24 (0.77, 2.00)             | 0.65 (0.37, 1.16)           | 0.69 (0.41, 1.17)             |
| <b>Model 2<sup>†</sup></b>  | 1.62 (0.93, 2.82)           | 1.27 (0.77, 2.08)             | 0.60 (0.33, 1.08)           | 0.63 (0.37, 1.10)             |
| <b>Model 3<sup>‡</sup></b>  | <b>1.76 (1.01, 3.07)</b>    | 1.19 (0.72, 1.96)             | 0.76 (0.43, 1.37)           | 0.68 (0.40, 1.16)             |
| <b>Model 4<sup>§</sup></b>  | <b>1.80 (1.04, 3.11)</b>    | 1.21 (0.74, 1.98)             | 0.70 (0.40, 1.25)           | 0.70 (0.41, 1.20)             |
| <b>Model 5<sup>  </sup></b> | <b>1.85 (1.04, 3.28)</b>    | 1.13 (0.68, 1.89)             | 0.80 (0.44, 1.46)           | 0.69 (0.39, 1.20)             |

\* Model 1: adjusted for age.

† Model 2: adjusted for age, income.

‡ Model 3: adjusted for age, baseline systolic BP.

§ Model 4: adjusted for age, anxiety, depression.

|| Model 5: adjusted for age, anxiety, depression, baseline systolic BP.

<sup>#</sup> Versus the “early discontinuation” group.

\*\* Versus the same sex without hypertension.

<https://doi.org/10.1371/journal.pone.0337284.t003>

with aging compared with men [22]. Additionally, women face additional barriers such as underrepresentation in clinical trials and underestimation of cardiovascular risk by clinical risk calculators, leading to higher rates of adverse drug effects and less aggressive/alternative treatments [10,39]. These disparities contribute to findings such as those of a recent meta-analysis which showed that women were less likely to be prescribed appropriate medical therapy for cardiovascular disease [40]. These increased risks have the potential to be offset through high adherence to HBPM, which could allow for close monitoring and titration of medications [40]. Future studies should examine the potential for the improvement of disparities in hypertension treatment and control if a highly adherent group such as women with hypertension are closely monitored with HBPM and given appropriate clinical guidance.

## Trajectory groups

Group-based trajectory modeling was used to derive three distinct trajectories of adherence to HBPM over the study period to examine adherence trajectories from a novel perspective. The high adherence trajectory group was the smallest and was characterized by those who achieved and maintained high levels of adherence throughout the one-year follow-up period. Given the overwhelming need for better blood pressure control nationally and internationally, our findings suggest that among certain patients, HBPM can be a tool that is accepted and used consistently.

## Maintaining adherence to HBPM

HBPM has been shown to be a convenient, acceptable, and effective method of diagnosing primary hypertension, white coat hypertension, and masked hypertension, and in helping to guide medication initiation and titration [41]. Particularly when combined with interventions such as remote telemonitoring, educational classes, and one-on-one counseling, HBPM is more effective than usual care at lowering blood pressure [18,42]. However, the major barrier that remains is how to best maximize adherence.

In our study, factors that were most strongly associated with high adherence were weakly associated with gradual decrease and inversely associated with early discontinuation. Throughout the one-year follow-up period in our study, over one-fifth of our participants maintained high adherence (>75%) to weekly HBPM. This high adherence group tended to be older in age, which

has been reported in prior studies [25,30,43]. This parallels findings that medication adherence may increase with older age, possibly due to older persons having greater severity of illness and fewer competing priorities such as young children and work, leading to awareness of chronic conditions and hence greater engagement with their health management [44].

Our BP adherence trajectory groups were found to have no significant differences in education level or full-time employment. This stands in contrast to the literature, including a survey study conducted in Texas, that found that persons with lower education level and income were significantly less likely to use blood pressure monitors [45]. Similarly, a Health-Styles survey found that regular HBPM was significantly associated with increased income, with a non-significant relationship seen with higher education level [26]. Lastly, a clustered randomized trial conducted in Minnesota found that higher education level, but not income level, predicted HBPM adherence [43].

Significantly more people in the early discontinuation group reported anxiety and depression, as compared to the gradual decrease and high adherence groups. It is possible that increased anxiety was a factor driving early discontinuation, perhaps due to worsening anxiety with blood pressure monitoring. In contrast, a randomized controlled trial conducted in England found that anxiety levels did not increase with HBPM [46]. In fact, a qualitative mixed methods study conducted with postpartum women found that self-management of blood pressure reduced anxiety [47]. However, a nationally representative survey of adults aged 50–80 years with hypertension or a blood pressure related health condition found that individuals who self-rated their mental health as “excellent or good” had a higher odds of regular HBPM, though anxiety/depression was not characterized [29].

Prior studies have identified other clinical factors associated with increased adherence to HBPM, including comorbidities of diabetes and coronary disease, being on antihypertensive medications, increased visceral obesity, having health insurance, and being more physically active [16,25,37]. These factors’ effect on adherence was not directly examined in our cohort. Data are mixed regarding demographic associations with adherence. A cross-sectional study of NHANES suggested that individuals who are non-Hispanic Blacks and non-Hispanic Asians more frequently adhere to HBPM [16], whereas a HealthStyles survey found that non-Hispanic Blacks and Hispanics were less likely to be regular HBPM users compared to non-Hispanic whites [26]. Given that our participants were largely non-Hispanic White, our study is underpowered to derive any conclusion on racial or ethnic differences with HBPM adherence.

## Real-world implications

The growing knowledge of the value of HBPM combined with the known undertreatment of hypertension despite its devastating, long-term cardiovascular complications present an opportunity to intervene and help patients achieve better blood pressure control. A physician’s recommendation of HBPM to patients has been found to increase rates of adherence not just to HBPM, but to medications as well [15]. The identification of subsets of patients less likely to adhere is important in identifying additional supports and resources.

## Use of digital health tools

Our findings on adherence patterns are crucial in the context of the growing Internet of Medical Things, where ongoing patient engagement is important for effective healthcare. As real-time monitoring and internet-connected devices become more widely available, treatment plans can be tailored to meet the needs of individual patients to a degree never seen in history due to the sheer volume of personalized health data that can be collected and integrated.

At the same time, the use of artificial intelligence on these large data sets presents an opportunity to unlock new insights that traditional analysis may have otherwise missed [48].

## Strengths and limitations

This study has several strengths. A major strength was that we utilized robust data from the eFHS. Our study cohort was moderate in size, with women comprising a slight majority. Participants were not provided financial incentives, which potentially reduced participation bias. We utilized standardized, validated methods in describing adherence based on

existing literature, increasing the validity and reproducibility of our study findings. Moreover, our group-based trajectory modeling is a relatively novel and unique mode of estimating a change the adherence overtime. The use of such a model allows for the identification of subtle trends within the data, raising questions that can drive further research. For example, by detecting a “high adherence” trajectory group, we have identified a subset of participants who can potentially serve as a basis for further research on how best to implement HBPM.

Our study also has several limitations. First, the study cohort was predominantly White, English-speaking only, well-educated, generally healthy, and resided in New England. As such, the findings may not be generalizable to persons from different racial or ethnic backgrounds, regions, chronic conditions, and social determinants of health. Additionally, the study required participants to have an iPhone and utilize internet connection, omitting those who owned Androids and those who may not have the means to obtain a smartphone and stable internet. As wearable device data becomes increasingly used in clinical and epidemiological research, we acknowledge that study populations will be biased towards overrepresenting individuals with the means to access such technologies.

Moreover, we examined the association between sex and adherence over a relatively short 12-month period. This limits our study’s generalizability of adherence in HBPM and long-term health benefits. Furthermore, these data are observational and cannot establish causal relations or rule out residual confounding. In the future, randomized studies would be needed to better elucidate factors driving increased adherence to HBPM. Finally, in our group-based trajectory modeling, we elected to choose a trajectory model that had a slightly suboptimal BIC score but was more clinically relevant. This has the potential to introduce statistical bias.

## Conclusion

In this middle-aged to older adult eFHS cohort, hypertension was associated with high adherence to HBPM in women with hypertension compared to those without. The targeted prescription of HBPM for women should be studied to see if it can reduce sex disparities in blood pressure control. Future studies should examine these associations in large populations of people with hypertension and consider further evaluation of how social determinants of health alter HBPM adherence.

## Supporting information

**S1 Table. Stratified multivariable logistic regression models evaluating hypertension and home blood pressure monitoring adherence in a 2-group trajectory model (high adherence vs low adherence) as a sensitivity analysis.**  
(DOCX)

**S2 Table. Multivariable logistic regression models evaluating hypertension and home blood pressure monitoring adherence.**  
(DOCX)

**S3 Table. Home blood pressure monitoring adherence by sex and hypertension status.**  
(DOCX)

## Acknowledgments

All authors have read and approved the submission of the manuscript; the manuscript has not been published and is not being considered for publication elsewhere, in whole or in part, in any language, except as an abstract.

## Author contributions

**Conceptualization:** Tenes J. Paul, Apurv Soni, Honghuang Lin, Lara C. Kovell.

**Data curation:** Katherine Sadaniantz, Jean-Claude Asaker, Ziyue Wang.

**Formal analysis:** Tenes J. Paul, Ziyue Wang, Lara C. Kovell.

**Funding acquisition:** David D. McManus.

**Methodology:** Tenes J. Paul, Apurv Soni, Honghuang Lin, Lara C. Kovell.

**Supervision:** Lara C. Kovell.

**Writing – original draft:** Tenes J. Paul.

**Writing – review & editing:** Tenes J. Paul, Katherine Sadaniantz, Apurv Soni, Jean-Claude Asaker, Chathurangi H. Pathiravasan, Jordy Mehawej, Andreas Filippaios, Yuankai Zhang, Ziyue Wang, Chunyu Liu, Honghuang Lin, Joanne M. Murabito, David D. McManus, Lara C. Kovell.

## References

1. Organization GWH. Global report on hypertension: the race against a silent killer; 2023. Licence: CC BY-NC-SA 3.0 IGO.
2. Martin SS, Aday AW, Almarzooq ZI, Anderson CAM, Arora P, Avery CL, et al. 2024 heart disease and stroke statistics: a report of US and global data from the American Heart Association. *Circulation*. 2024;149(8):e347–913.
3. Muntner P, Carey RM, Gidding S, Jones DW, Taler SJ, Wright JT Jr, et al. Potential US population impact of the 2017 ACC/AHA high blood pressure guideline. *Circulation*. 2018;137(2):109–18. <https://doi.org/10.1161/CIRCULATIONAHA.117.032582> PMID: 29133599
4. Whelton PK, Carey RM, Aronow WS, Casey DE Jr, Collins KJ, Dennison Himmelfarb C, et al. 2017 ACC/AHA/AAPA/ABC/ACPM/AGS/APhA/ASH/ASPC/NMA/PCNA guideline for the prevention, detection, evaluation, and management of high blood pressure in adults: a report of the American College of Cardiology/American Heart Association Task Force on Clinical Practice Guidelines. *Hypertension*. 2018;71(6):e13–115. <https://doi.org/10.1161/HYP.0000000000000065> PMID: 29133356
5. Global burden of 288 causes of death and life expectancy decomposition in 204 countries and territories and 811 subnational locations, 1990–2021: a systematic analysis for the Global Burden of Disease Study 2021. *Lancet*. 2024;403(10440):2100–32.
6. Bundy JD, Li C, Stuchlik P, Bu X, Kelly TN, Mills KT, et al. Systolic blood pressure reduction and risk of cardiovascular disease and mortality: a systematic review and network meta-analysis. *JAMA Cardiol*. 2017;2(7):775–81. <https://doi.org/10.1001/jamacardio.2017.1421> PMID: 28564682
7. Muntner P, Hardy ST, Fine LJ, Jaeger BC, Wozniak G, Levitan EB. Trends in blood pressure control among US adults with hypertension, 1999–2000 to 2017–2018. *JAMA*. 2020;324(12):1190–200.
8. Leung AA, Williams JVA, McAlister FA, Campbell NRC, Padwal RS, Hypertension Canada's Research and Evaluation Committee. Worsening hypertension awareness, treatment, and control rates in Canadian women between 2007 and 2017. *Can J Cardiol*. 2020;36(5):732–9. <https://doi.org/10.1016/j.cjca.2020.02.092> PMID: 32299635
9. Osude N, Durazo-Arvizu R, Markossian T, Liu K, Michos ED, Rakotz M, et al. Age and sex disparities in hypertension control: the multi-ethnic study of atherosclerosis (MESA). *Am J Prev Cardiol*. 2021;8:100230. <https://doi.org/10.1016/j.ajpc.2021.100230> PMID: 34430952
10. Gillis EE, Sullivan JC. Sex differences in hypertension: recent advances. *Hypertension*. 2016;68(6):1322–7.
11. Kario K, Thijs L, Staessen JA. Blood pressure measurement and treatment decisions. *Circ Res*. 2019;124(7):990–1008.
12. Zhou L, He L, Kong Y, Lai Y, Dong J, Ma C. Effectiveness of mHealth interventions for improving hypertension control in uncontrolled hypertensive patients: a meta-analysis of randomized controlled trials. *J Clin Hypertens (Greenwich)*. 2023;25(7):591–600. <https://doi.org/10.1111/jch.14690> PMID: 37409556
13. Little P, Barnett J, Barnsley L, Marjoram J, Fitzgerald-Barron A, Mant D. Comparison of agreement between different measures of blood pressure in primary care and daytime ambulatory blood pressure. *BMJ*. 2002;325(7358):254. <https://doi.org/10.1136/bmj.325.7358.254> PMID: 12153923
14. Williams B, Mancia G, Spiering W, Agabiti Rosei E, Azizi M, Burnier M, et al. 2018 ESC/ESH Guidelines for the management of arterial hypertension: the Task Force for the management of arterial hypertension of the European Society of Cardiology and the European Society of Hypertension: the Task Force for the management of arterial hypertension of the European Society of Cardiology and the European Society of Hypertension. *J Hypertens*. 2018;36(10):1953–2041. <https://doi.org/10.1097/HJH.0000000000001940> PMID: 30234752
15. Tang O, Foti K, Miller ER, Appel LJ, Juraschek SP. Factors associated with physician recommendation of home blood pressure monitoring and blood pressure in the US population. *Am J Hypertens*. 2020;33(9):852–9.
16. Ostchega Y, Zhang G, Kit BK, Nwankwo T. Factors associated with home blood pressure monitoring among US adults: National Health and Nutrition Examination Survey, 2011–2014. *Am J Hypertens*. 2017;30(11):1126–32.
17. Turana Y, Tengkawan J, Soenarta AA. Asian management of hypertension: current status, home blood pressure, and specific concerns in Indonesia. *J Clin Hypertens (Greenwich)*. 2020;22(3):483–5. <https://doi.org/10.1111/jch.13681> PMID: 31680397
18. Tucker KL, Sheppard JP, Stevens R, Bosworth HB, Bove A, Bray EP, et al. Self-monitoring of blood pressure in hypertension: a systematic review and individual patient data meta-analysis. *PLoS Med*. 2017;14(9):e1002389. <https://doi.org/10.1371/journal.pmed.1002389> PMID: 28926573

19. Artinian NT, Washington OG, Templin TN. Effects of home telemonitoring and community-based monitoring on blood pressure control in urban African Americans: a pilot study. *Heart Lung*. 2001;30(3):191–9. <https://doi.org/10.1067/mhl.2001.112684> PMID: [11343005](#)
20. Omboni S, Ferrari R. The role of telemedicine in hypertension management: focus on blood pressure telemonitoring. *Curr Hypertens Rep*. 2015;17(4):535. <https://doi.org/10.1007/s11906-015-0535-3> PMID: [25790799](#)
21. Ohata C, Asayama K, Hosaka M, Nomura K, Yamamura T, Kimura T, et al. Self-measured home blood pressure highlights cardiovascular risk in women: the HOMED-BP study. *Hypertens Res*. 2023;46(10):2400–8. <https://doi.org/10.1038/s41440-023-01408-6> PMID: [37592040](#)
22. Ji H, Kim A, Ebinger JE, Niiranen TJ, Claggett BL, Bairey Merz CN, et al. Sex differences in blood pressure trajectories over the life course. *JAMA Cardiol*. 2020;5(3):19–26. <https://doi.org/10.1001/jamacardio.2019.5306> PMID: [31940010](#)
23. Satoh M, Metoki H, Asayama K, Murakami T, Inoue R, Tsubota-Utsugi M, et al. Age-related trends in home blood pressure, home pulse rate, and day-to-day blood pressure and pulse rate variability based on longitudinal cohort data: the Ohasama Study. *J Am Heart Assoc*. 2019;8(15):e012121. <https://doi.org/10.1161/JAHA.119.012121> PMID: [31333055](#)
24. Ben-Dov IZ, Mekler J, Bursztyn M. Sex differences in ambulatory blood pressure monitoring. *Am J Med*. 2008;121(6):509–14.
25. Chudek A, Owczarek AJ, Ficek J, Almgren-Rachtan A, Chudek J. Lower utilization of home blood pressure monitoring in younger, poorly educated hypertensive males - real-life data. *Blood Press*. 2020;29(2):95–102. <https://doi.org/10.1080/08037051.2019.1684818> PMID: [31691573](#)
26. Ayala C, Tong X, Keenan NL. Regular use of a home blood pressure monitor by hypertensive adults—HealthStyles, 2005 and 2008. *J Clin Hypertens (Greenwich)*. 2012;14(3):172–7. <https://doi.org/10.1111/j.1751-7176.2011.00582.x> PMID: [22372777](#)
27. Omboni S, Khan NA, Kunadian V, Olszanecka A, Schutte AE, Mihailidou AS. Sex differences in ambulatory blood pressure levels and subtypes in a large Italian community cohort. *Hypertension*. 2023;80(7):1417–26. <https://doi.org/10.1161/HYPERTENSIONAHA.122.20589> PMID: [37315119](#)
28. Zuo H-J, Ma J-X, Wang J-W, Chen X-R. Assessing the routine-practice gap for home blood pressure monitoring among Chinese adults with hypertension. *BMC Public Health*. 2020;20(1):1770. <https://doi.org/10.1186/s12889-020-09901-0> PMID: [33228626](#)
29. Springer MV, Malani P, Solway E, Kirch M, Singer DC, Kullgren JT, et al. Prevalence and frequency of self-measured blood pressure monitoring in US adults aged 50–80 years. *JAMA Netw Open*. 2022;5(9):e2231772. <https://doi.org/10.1001/jamanetworkopen.2022.31772> PMID: [36103183](#)
30. Pathiravasan CH, Zhang Y, Wang X, Trinquart L, Benjamin EJ, Borrelli B, et al. Factors associated with long-term use of digital devices in the electronic Framingham Heart Study. *NPJ Digit Med*. 2022;5(1):195. <https://doi.org/10.1038/s41746-022-00735-1> PMID: [36572707](#)
31. McManus DD, Trinquart L, Benjamin EJ, Manders ES, Fusco K, Jung LS, et al. Design and preliminary findings from a new electronic cohort embedded in the Framingham Heart Study. *J Med Internet Res*. 2019;21(3):e12143. <https://doi.org/10.2196/12143> PMID: [30821691](#)
32. Sardana M, Lin H, Zhang Y, Liu C, Trinquart L, Benjamin EJ, et al. Association of habitual physical activity with home blood pressure in the Electronic Framingham Heart Study (eFHS): cross-sectional study. *J Med Internet Res*. 2021;23(6):e25591. <https://doi.org/10.2196/25591> PMID: [34185019](#)
33. Topouchian J, Agnoletti D, Blacher J, Youssef A, Chahine MN, Ibanez I. Validation of four devices: Omron M6 Comfort, Omron HEM-7420, Withings BP-800, and Polygreen KP-7670 for home blood pressure measurement according to the European Society of Hypertension International Protocol. *Vasc Health Risk Manag*. 2014;10:33–44.
34. Guo X, Vittinghoff E, Olgin JE, Marcus GM, Pletcher MJ. Volunteer participation in the Health eHeart Study: a comparison with the US population. *Sci Rep*. 2017;7(1):1956.
35. Schillinger D. Social determinants, health literacy, and disparities: intersections and controversies. *Health Lit Res Pract*. 2021;5(3):e234–43.
36. Logan AG, McIsaac WJ, Tisler A, Irvine MJ, Saunders A, Dunai A, et al. Mobile phone-based remote patient monitoring system for management of hypertension in diabetic patients. *Am J Hypertens*. 2007;20(9):942–8. <https://doi.org/10.1016/j.amjhyper.2007.03.020> PMID: [17765133](#)
37. Vallée A, Gabet A, Grave C, Lelong H, Blacher J, Olié V. Home blood pressure monitoring in France: device possession rate and associated determinants, the Esteban study. *J Clin Hypertens (Greenwich)*. 2020;22(12):2204–13. <https://doi.org/10.1111/jch.14055> PMID: [32966691](#)
38. Wei Y-C, George NI, Chang C-W, Hicks KA. Assessing sex differences in the risk of cardiovascular disease and mortality per increment in systolic blood pressure: a systematic review and meta-analysis of follow-up studies in the United States. *PLoS One*. 2017;12(1):e0170218. <https://doi.org/10.1371/journal.pone.0170218> PMID: [28122035](#)
39. Connelly PJ, Currie G, Delles C. Sex differences in the prevalence, outcomes and management of hypertension. *Curr Hypertens Rep*. 2022;24(6):185–92. <https://doi.org/10.1007/s11906-022-01183-8> PMID: [35254589](#)
40. Zhao M, Woodward M, Vaartjes I, Millett ERC, Klipstein-Grobusch K, Hyun K, et al. Sex differences in cardiovascular medication prescription in primary care: a systematic review and meta-analysis. *J Am Heart Assoc*. 2020;9(11):e014742.
41. Kario K, Shimbo D, Hoshida S, Wang JG, Asayama K, Ohkubo T. Emergence of home blood pressure-guided management of hypertension based on global evidence. *Hypertension*. 2019;74(2):229–36.
42. McManus RJ, Mant J, Bray EP, Holder R, Jones MI, Greenfield S, et al. Telemonitoring and self-management in the control of hypertension (TAS-MINH2): a randomised controlled trial. *Lancet*. 2010;376(9736):163–72. [https://doi.org/10.1016/S0140-6736\(10\)60964-6](https://doi.org/10.1016/S0140-6736(10)60964-6) PMID: [20619448](#)
43. Kerby TJ, Asche SE, Maciosek MV, O'Connor PJ, Sperl-Hillen JM, Margolis KL. Adherence to blood pressure telemonitoring in a cluster-randomized clinical trial. *J Clin Hypertens (Greenwich)*. 2012;14(10):668–74. <https://doi.org/10.1111/j.1751-7176.2012.00685.x> PMID: [23031143](#)

44. Kim SJ, Kwon OD, Han EB, Lee CM, Oh S-W, Joh H-K, et al. Impact of number of medications and age on adherence to antihypertensive medications: a nationwide population-based study. *Medicine (Baltimore)*. 2019;98(49):e17825. <https://doi.org/10.1097/MD.00000000000017825> PMID: [31804305](https://pubmed.ncbi.nlm.nih.gov/31804305/)
45. Poon IO, Etti N, Lal LS. Does the use of home blood pressure monitoring vary by race, education, and income? *Ethn Dis*. 2010;20(1):2–6. PMID: [20178174](https://pubmed.ncbi.nlm.nih.gov/20178174/)
46. McManus RJ, Mant J, Roalfe A, Oakes RA, Bryan S, Pattison HM, et al. Targets and self monitoring in hypertension: randomised controlled trial and cost effectiveness analysis. *BMJ*. 2005;331(7515):493. <https://doi.org/10.1136/bmj.38558.393669.E0> PMID: [16115830](https://pubmed.ncbi.nlm.nih.gov/16115830/)
47. Cairns AE, Tucker KL, Crawford C, McManus RJ, Powell J. Implementing self-management: a mixed methods study of women's experiences of a postpartum hypertension intervention (SNAP-HT). *Trials*. 2020;21(1):508. <https://doi.org/10.1186/s13063-020-04394-z> PMID: [32517785](https://pubmed.ncbi.nlm.nih.gov/32517785/)
48. Pati A, Addula SR, Panigrahi A, Sahu B, Nayak DSK, Dash M. Artificial intelligence in improving disease diagnosis. In: *Artificial intelligence in medicine and healthcare*. 1st ed. CRC Press; 2025. p. 24–49. <https://doi.org/10.1201/9781003508595-2>
